# Supplementary material
Source: bioRxiv or medRxiv preprint supplement (https://medrxiv.org/highwire/filestream/82067/field_highwire_adjunct_files/2/2020.05.20.20102707-3.pdf)
Supplement: Supplementary file [file 2020.05.20.20102707-3.pdf]

**Supplementary Figure 1. Flowchart illustrating the recruitment process and the selection of the final sample for analysis**

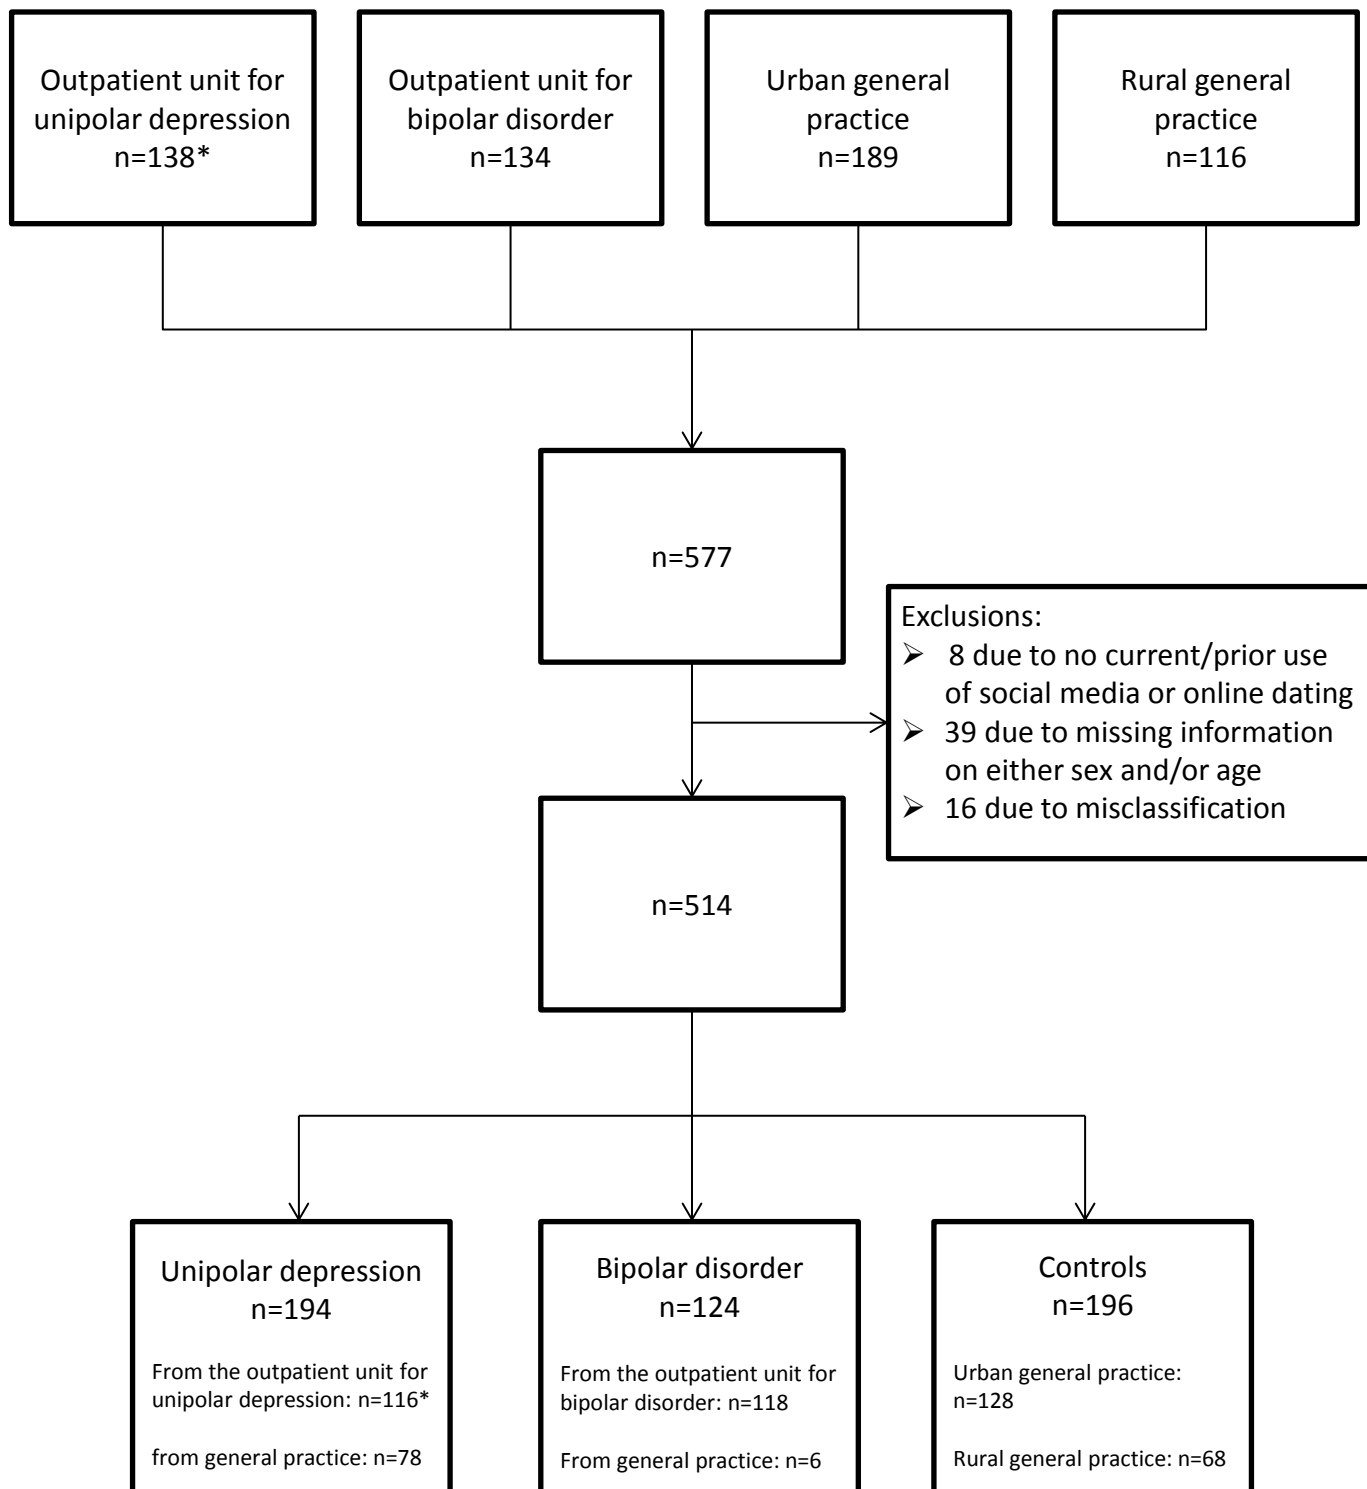

\* Including patients from the collaborative care unit
